# Supplementary material for: Mutation of OsCAX1a Results in Panicle Degeneration in Rice
Source: Research Square preprint supplement (doi:10.21203/rs.3.rs-1147067/v1), 2021-12-09
Supplement: Supplementary file 1 [file 1da214c58673712aa7a8a494.docx]

**
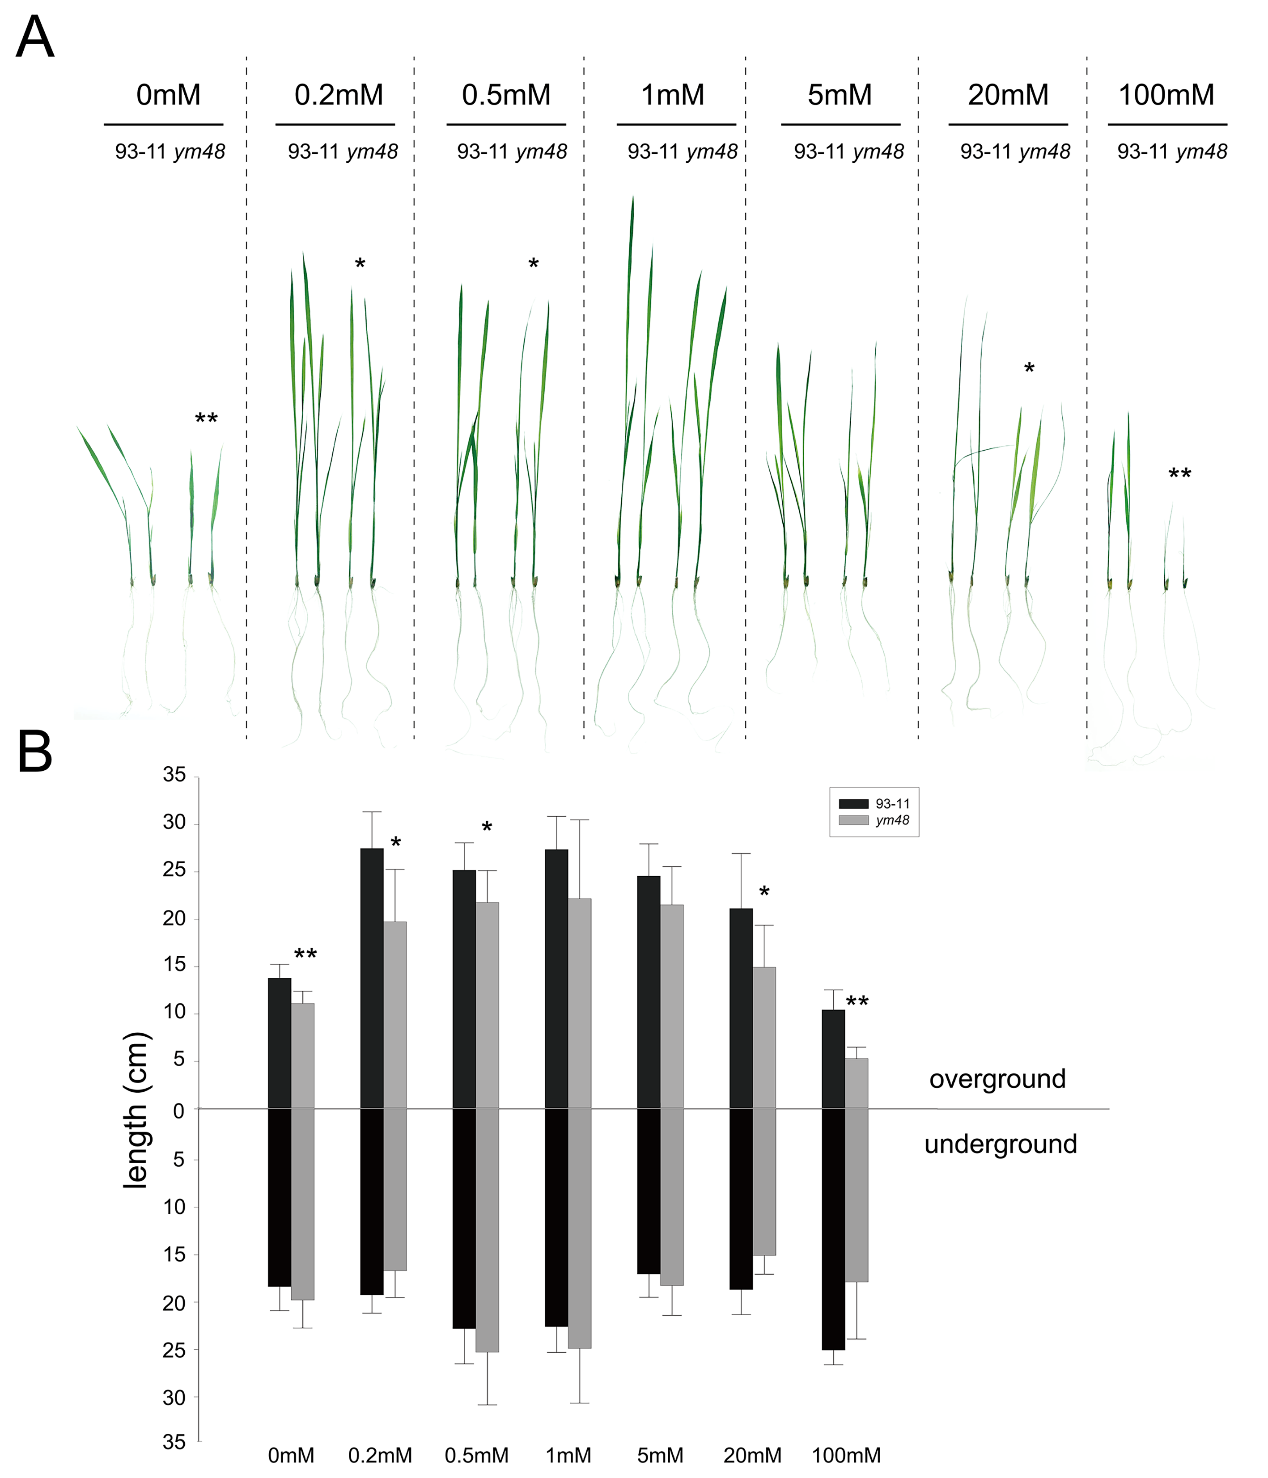
Supplementary Fig. 1** Physiological analysis of wild type 93-11 and *ym48* mutant through hydroponics.Hydroponic solutions with 7 different concentrations of CaCl2 (0, 0.2, 0.5, 1, 5, 20 and 100 mM) were used. **A** 93-11 and *ym48* plants were grown for 4 weeks in hydroponic solutions with 7 different concentrations of CaCl2. **B** Shoots and roots length in 93-11 and *ym48* plants. Asterisks represent statistically significant differences from 93-11, as determined by Student’s t test. *P < 0.05, **P < 0.01.
