# Supplementary material for: Mutation of OsCAX1a Results in Panicle Degeneration in Rice
Source: Research Square preprint supplement (doi:10.21203/rs.3.rs-1147067/v1), 2021-12-09
Supplement: Supplementary file 2 [file 2c023b6504a5dc7c932b9855.docx]

**Supplementary Table** **3.** Gene accession numbers and links of CAX family in rice and *Arabidopsis*.

| **Gene Name** | **Accession Numbers** | **Links** |
| --- | --- | --- |
| OsCAX1a | Os01t0557500-01 | https://rapdb.dna.affrc.go.jp/viewer/gene_detail/irgsp1?name=Os01t0557500-01;feature_id=84673 |
| OsCAX1b | Os05t0594200-01 | https://rapdb.dna.affrc.go.jp/viewer/gene_detail/irgsp1?name=Os05t0594200-01;feature_id=242262 |
| OsCAX1c | Os02t0314300-00 | https://rapdb.dna.affrc.go.jp/viewer/gene_detail/irgsp1?name=Os02t0314300-00;feature_id=124832 |
| OsCAX2 | Os03t0397400-01 | https://rapdb.dna.affrc.go.jp/viewer/gene_detail/irgsp1?name=Os03t0397400-01;feature_id=169188 |
| OsCAX3 | Os04t0653200-01 | https://rapdb.dna.affrc.go.jp/viewer/gene_detail/irgsp1?name=Os04t0653200-01;feature_id=213353 |
| OsCAX4 | Os02t0138900-01 | https://rapdb.dna.affrc.go.jp/viewer/gene_detail/irgsp1?name=Os02t0138900-01;feature_id=115209 |
| AtCAX1 | AT2G38170.3 | https://www.arabidopsis.org/servlets/TairObject?type=gene&id=1000642333 |
| AtCAX2 | AT3G13320.1 | https://www.arabidopsis.org/servlets/TairObject?type=gene&id=39376 |
| AtCAX3 | AT3G51860.1 | https://www.arabidopsis.org/servlets/TairObject?type=gene&id=36943 |
| AtCAX4 | AT5G01490.1 | https://www.arabidopsis.org/servlets/TairObject?type=gene&id=132686 |
| AtCAX5 | AT1G55730.1 | https://www.arabidopsis.org/servlets/TairObject?type=gene&id=30072 |
| AtCAX6 | AT1G55720.1 | https://www.arabidopsis.org/servlets/TairObject?type=gene&id=30079 |
