# Supplementary material for: Mutation of OsCAX1a Results in Panicle Degeneration in Rice
Source: Research Square preprint supplement (doi:10.21203/rs.3.rs-1147067/v1), 2021-12-09
Supplement: Supplementary file 5 [file e28e29e11f542b6e83f6299a.docx]

**Supplementary Table** **2.** Major MEME motif sequences of CAX family in *Arabidopsis* and rice.

| **Motif** | **Sequence** |
| --- | --- |
| 1 | FISIILLPIVGNAAEHAGAIIFAMKBKLDISLGVAJGSATQISMFVVPFC |
| 2 | QGWVFLLSLIGJTPLAERLSFLTEQJAFYTGPTVGGLLNATFGNATELII |
| 3 | VVGWMMGIQMDLNFQLLETASLFITVJVVAFTLQ |
| 4 | KNGKIRVVKLSLLGSILSNLLLVLGTSLFCGGIVNLRKEQVFDKKQADVN |
| 5 | EDTSDEDEEPEIGFWEAIIWLAIMTAWISLLSGYLVDAIEGASESWNJPV |
| 6 | DGTSNYLKGLMLJLCYLIIAASFFVHEDP |
| 7 | LSRFSSCIMLIAYAAYLFFQLKSHRQLYEPQ |
| 8 | SGLLLMAVLGLLFPLVLHYTHSEVHYGSS |
| 9 | LANLQEVILGTKLNLLFPAGPLAILAHYL |
| 10 | RTAHNMSSSSLRKKSDLRLVQKVPCKPLK |
| 11 | MGCCKVPALIQAQVEMGLVNEVEHKSLFRQETDSPQTKAASLMEQGS |
| 12 | RERSPKAPKNS |
| 13 | ENGNPNITAKGSSRELR |
| 14 | QREDDDDD |
| 15 | DKPQICTCRRPRRT |
| 16 | MAKPEAVRHH |
| 17 | EESNQN |
| 18 | WEFQRR |
| 19 | GIIVEPW |
| 20 | EEEEKKEAARWPP |
