# Supplementary material for: Mutation of OsCAX1a Results in Panicle Degeneration in Rice
Source: Research Square preprint supplement (doi:10.21203/rs.3.rs-1147067/v1), 2021-12-09
Supplement: Supplementary file 8 [file d47576e783119883352bd579.docx]

**Supplementary Table** **1.** The primers used in this research.

| **Name** | **Sequence (5’ to 3’)** |
| --- | --- |
| IL-14-F | CAGCATTCTGGCTTACCCAATATCGGTGTG |
| IL-14-R | TCTGGTGCATAGGTATCTGGCAATGGTTCTC |
| IL-19-F | ACCATCACTGTTGGAGGCATGTCACGA |
| IL-19-R | CATGTGGTCTTCTTGGTTGCGAGGAGTAGA |
| IL-20-F | TTGTCTACTGCCAGTGAGGGTGCCTAAC |
| IL-20-R | TCACTTTAAGTACAGAACTGGAGCCAATGGGA |
| IR-19-F | TGGAGCTAGTAGTTGGCTATACTATTGACCTTCTCT |
| IR-19-R | GCGAGAGCGATGCCCGTGATGAATC |
| RM5-F | CACACTCCCATGCTAACAACTGG |
| RM5-R | CATCAAGAAGAGCAGTCCTGTGC |
| IL-34-F | ACTAGTTAGGTGCCCGTGCATTGC |
| IL-34-R | ACTCTTGTGGTCCTCACAGAGCTAAGC |
| RM11160-F | TTTCTCCATGCTTATGGTGTGG |
| RM11160-R | GCATGATGGATCATATCGTCTTCC |
| RM11162-F | AGTCCACCCAGTCCGTCAATGG |
| RM11162-R | GAACACTCCTCCTCTGTTCTCACTCG |
| RM11166-F | GGAGAGCACGATCTGGAAGC |
| RM11166-R | CGGAATTTAACCTGGGAATTGG |
| IR-4-F | TGGATGAAGCCCTTGGTTGGGTTGACT |
| IR-4-R | CACGGCATATGGCAGAAGCTGTGACATAAC |
| IR-14-F | TGAAGGCGACGAGTAACCCACCTGAC |
| IR-14-R | GTTCTCTAATGTAACCTGAACGGAATCATTGGCTT |
| RM11241-F | TGCCTCTGCTTGACTTCACTTCC |
| RM11241-R | TTGTCCTTGACGCATGTAGTAGTCC |
| Oe-CAX1a-F | CGAGCTCATGGAGGCGGCGGCGG |
| Oe-CAX1a-R | CGAGCTCTCATGCGGCCTGAACAC |
| Cas9-CAX1a-F | GGCAACTGGTTGCGGTCGTAGGGCTGG |
| Cas9-CAX1a-R | AAACCCAGCCCTACGACCGCAACCAGT |
| qPCR-CAX1a-F | CTCTCCGTCAGCTTCATCAGCATCATCCT |
| qPCR-CAX1a-R | AGCACACTCAGTGGCACCACGAACA |
| qPCR-Actin-F | CCTGACGGAGCGTGGTTAC |
| qPCR-Actin-R | CCAGGGCGATGTAGGAAAGC |
| GUS-CAX1a-F | CGGGGTACCGCGTAACAAAAAAGAAGATTAGG |
| GUS-CAX1a-R | ACGCGTCGACCTAGACAGTCTGCTACCAAAT |
| SL-CAX1a-F | ATGGAGGCGGCGGCGGCGATGGA |
| SL-CAX1a-R | TCATGCGGCCTGAACACTCATGGAA |
